# Supplementary material
Source: publisher figshare collection journal article supplement (https://acs.figshare.com/ndownloader/files/4554880)

## Supporting Information

### **Identification of 3-acetyl-2-aminoquinolin-4-one as a novel, nonpeptidic scaffold for specific calpain inhibitory activity**

*Da-Hye Kang,<sup>†,#</sup> Kyu-Yeon Jun,<sup>†,#</sup> Jin Pyo Lee,<sup>¥</sup> Chwang Siek Pak,<sup>§</sup> Younghwa Na,<sup>‡</sup>*

*and Youngjoo Kwon<sup>\*,†</sup>*

<sup>†</sup>College of Pharmacy & Division of Life & Pharmaceutical Sciences, Ewha Womans University, Seoul, 120-750, Korea, <sup>¥</sup>Department of Chemistry, Chungnam National University, Daejeon, 305-764, Korea, <sup>§</sup>Drug Discovery Division, Korea Research Institute of Chemical Technology, Daejeon, 305-600, Korea. <sup>‡</sup>College of Pharmacy, Catholic University of Daegu, Gyeongsan, Gyeongbuk, 712-702, Korea.

\*To whom correspondence should be addressed. Phone: 82-2-3277-4653. Fax: 82-2-3277-3051. E-mail: ykwon@ewha.ac.kr

<sup>#</sup>These authors equally contributed to this work.

Table of Contents:

|                                              |    |
|----------------------------------------------|----|
| Figure S1.                                   | S2 |
| General Procedure for LC/MS                  | S3 |
| Table S1. LC/MS analyses for compounds 1-22. | S4 |
| LC/MS data for compounds 1-22                | S5 |

### Result of optimization of fluorimetric calpain assay 1

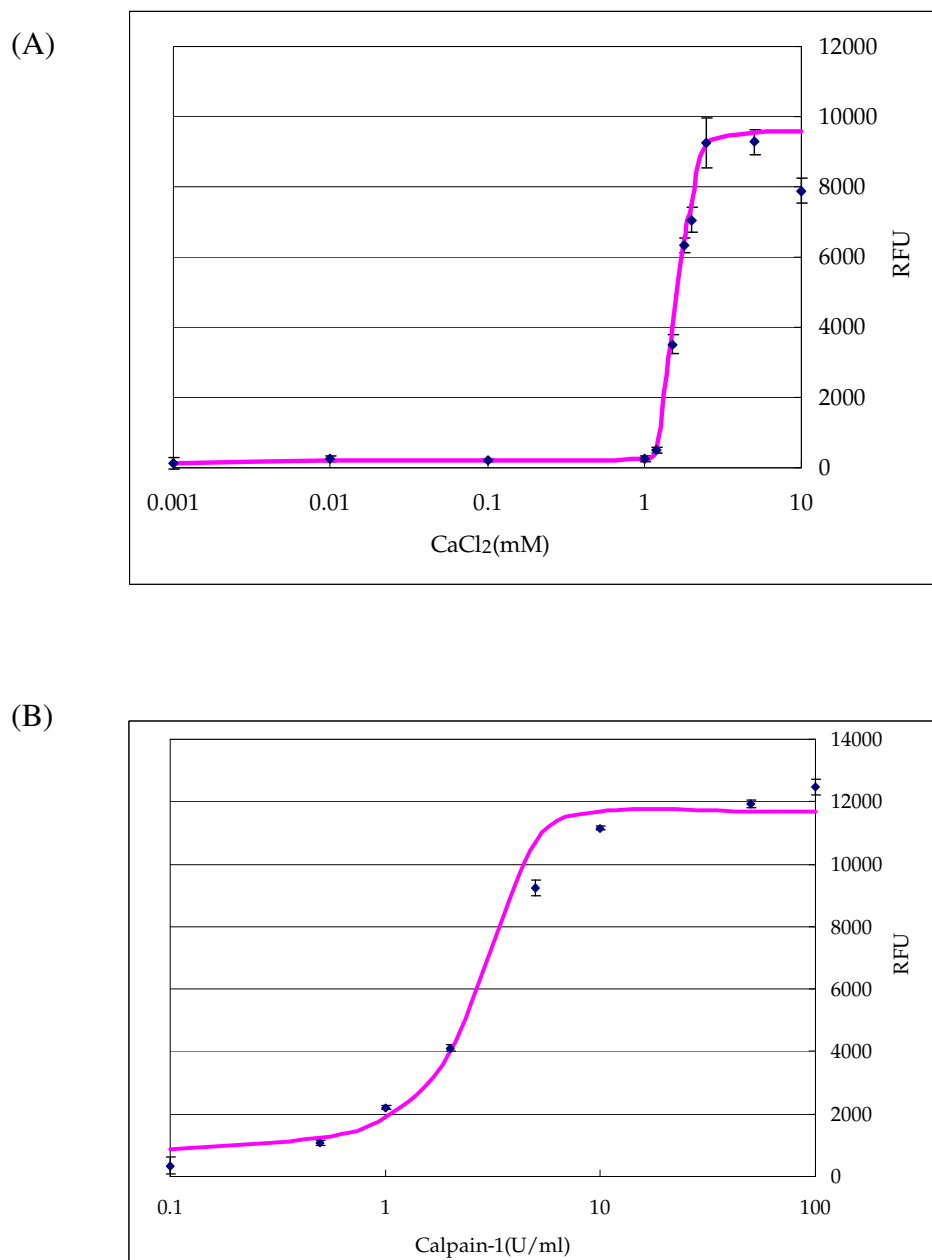

Figure S1. Effect of  $\text{CaCl}_2$  concentration (A) and  $\mu$ -calpain amount (B) on the proteolytic activity of  $\mu$ -calpain.

**General Procedure for LC/MS:** LC/MS was employed to check the purity of the compounds. LC/MS was carried out with a Waters 2795(LC-MS) Micromass (ZQ 2000) equipped with XTerra® MS C18 column, 4.6×5mm, 5µm, HPLC with a linear gradient 5% to 80% 0.02% CF<sub>3</sub>CO<sub>2</sub>H/ACN into 0.02% CF<sub>3</sub>CO<sub>2</sub>H/H<sub>2</sub>O over 2.5 to 3.5 minutes at flow rate 2 mL/min. UV detection (PDA Detector(2996)) was carried out at wavelength 254nm. Data are detailed in Table S1. Traces and MS data are presented in compound number order thereafter.

Table S1. LC/MS analyses for compounds 1-22.

| Compound | Formula                                                                                      | M.W.  | LC rt (min) | m/z   | Purity (%) |
|----------|----------------------------------------------------------------------------------------------|-------|-------------|-------|------------|
| 1        | C <sub>17</sub> H <sub>11</sub> Cl <sub>2</sub> N <sub>3</sub> O <sub>4</sub>                | 392.2 | 2.78        | 392.0 | 97         |
| 2        | C <sub>21</sub> H <sub>20</sub> ClN <sub>3</sub> O <sub>4</sub>                              | 413.9 | 4.07        | 414.1 | 96         |
| 3        | C <sub>18</sub> H <sub>11</sub> Cl <sub>2</sub> F <sub>3</sub> N <sub>2</sub> O <sub>2</sub> | 415.2 | 2.87        | 415.1 | 97         |
| 4        | C <sub>19</sub> H <sub>11</sub> ClF <sub>6</sub> N <sub>2</sub> O <sub>2</sub>               | 448.7 | 3.08        | 449.2 | 94         |
| 5        | C <sub>18</sub> H <sub>13</sub> Cl <sub>2</sub> N <sub>3</sub> O <sub>4</sub>                | 406.2 | 3.83        | 406.0 | 97         |
| 6        | C <sub>17</sub> H <sub>10</sub> Cl <sub>3</sub> N <sub>3</sub> O <sub>4</sub>                | 426.6 | 3.85        | 427.9 | 94         |
| 7        | C <sub>18</sub> H <sub>11</sub> Cl <sub>2</sub> F <sub>3</sub> N <sub>2</sub> O <sub>2</sub> | 415.2 | 2.95        | 415.0 | 98         |
| 8        | C <sub>23</sub> H <sub>17</sub> FN <sub>2</sub> O <sub>2</sub>                               | 372.4 | 2.70        | 373.2 | 96         |
| 9        | C <sub>17</sub> H <sub>11</sub> Br <sub>3</sub> N <sub>2</sub> O <sub>2</sub>                | 515.0 | 3.82        | 514.8 | 69         |
| 10       | C <sub>17</sub> H <sub>11</sub> BrCl <sub>2</sub> N <sub>2</sub> O <sub>2</sub>              | 426.1 | 2.85        | 427.0 | 94         |
| 11       | C <sub>17</sub> H <sub>10</sub> Cl <sub>4</sub> N <sub>2</sub> O <sub>2</sub>                | 416.1 | 3.82        | 416.9 | 94         |
| 12       | C <sub>18</sub> H <sub>14</sub> ClN <sub>3</sub> O <sub>4</sub>                              | 371.8 | 2.73        | 372.1 | 98         |
| 13       | C <sub>17</sub> H <sub>12</sub> ClFN <sub>2</sub> O <sub>2</sub>                             | 330.7 | 2.45        | 331.1 | 100        |
| 14       | C <sub>21</sub> H <sub>20</sub> F <sub>2</sub> N <sub>2</sub> O <sub>2</sub>                 | 370.4 | 2.83        | 371.2 | 83         |
| 15       | C <sub>17</sub> H <sub>11</sub> ClF <sub>2</sub> N <sub>2</sub> O <sub>2</sub>               | 348.7 | 2.38        | 349.1 | 88         |
| 16       | C <sub>19</sub> H <sub>10</sub> F <sub>8</sub> N <sub>2</sub> O <sub>2</sub>                 | 450.3 | 2.72        | 451.1 | 98         |
| 17       | C <sub>18</sub> H <sub>13</sub> Br <sub>2</sub> ClN <sub>2</sub> O <sub>2</sub>              | 484.6 | 4.17        | 484.8 | 88         |
| 18       | C <sub>18</sub> H <sub>13</sub> Cl <sub>2</sub> FN <sub>2</sub> O <sub>2</sub>               | 379.2 | 2.98        | 379.1 | 98         |
| 19       | C <sub>18</sub> H <sub>12</sub> ClF <sub>3</sub> N <sub>2</sub> O <sub>2</sub>               | 380.7 | 2.90        | 381.1 | 100        |
| 20       | C <sub>18</sub> H <sub>12</sub> ClF <sub>3</sub> N <sub>2</sub> O <sub>2</sub>               | 380.7 | 2.75        | 381.1 | 98         |
| 21       | C <sub>19</sub> H <sub>13</sub> ClF <sub>4</sub> N <sub>2</sub> O <sub>2</sub>               | 412.8 | 2.93        | 413.1 | 97         |
| 22       | C <sub>17</sub> H <sub>9</sub> F <sub>5</sub> N <sub>2</sub> O <sub>2</sub>                  | 368.3 | 2.50        | 369.1 | 99         |

## Compound 1

Sample 53 Vial 1:53 ID 53 File ri845-53 Date 12-May-2006 Time 21:57:11 Description

3: UV Detector: TIC Smooth (Mn, 2x2)

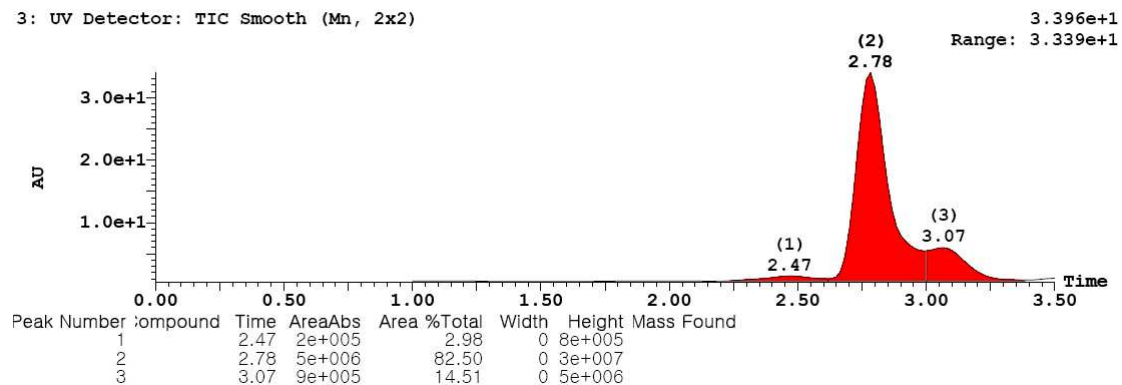

Peak ID :omponent Time Mass Found  
2 2.78

Combine (117:121-88:91)

1:MS ES+  
5.3e+005

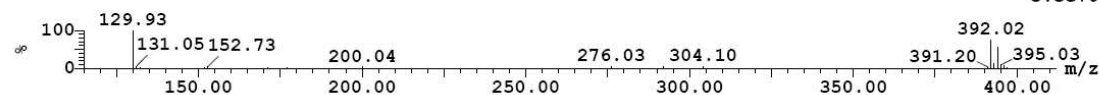

## Compound 2

Sample 1 Vial 3:1 ID A File ri847-1 Date 27-Nov-2008 Time 14:31:25 Description

3: UV Detector: TIC Smooth (Mn, 2x3)

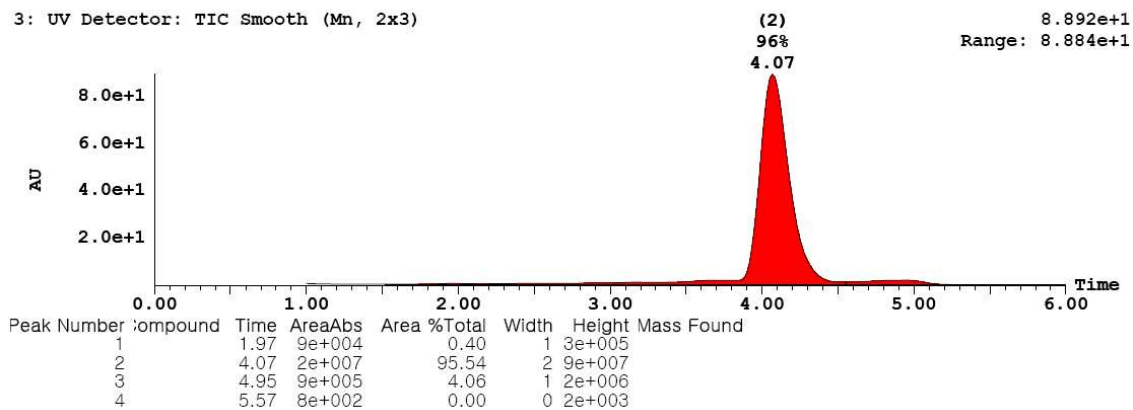

Peak ID :omponent Time Mass Found  
2 4.07

Combine (200:204-(80:82+251:253))

1:MS ES+  
2.1e+007

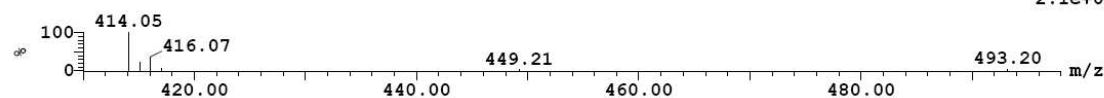

### Compound 3

Sample 6 Vial 3:6 ID 6 File ri915-06 Date 31-May-2006 Time 01:00:19 Description

3: UV Detector: TIC Smooth (Mn, 2x2)

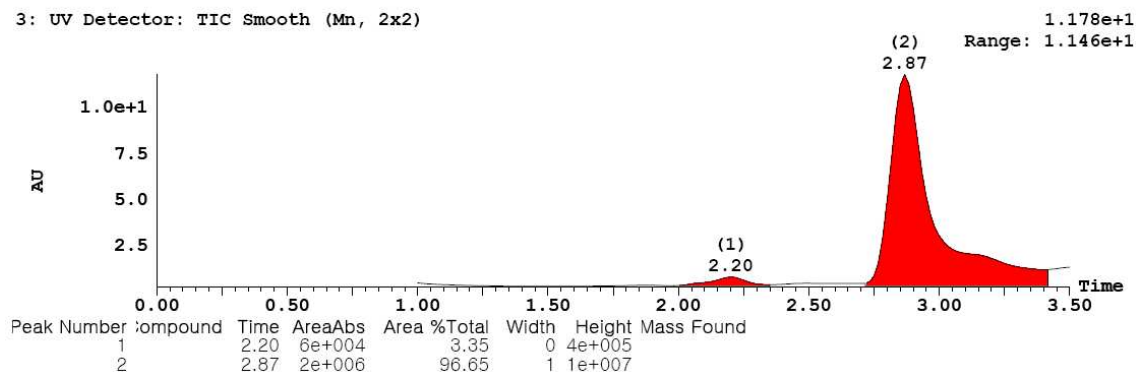

Peak ID :compound Time Mass Found  
2 2.87

Combine (120:125-93:95)

1:MS ES+  
4.3e+005

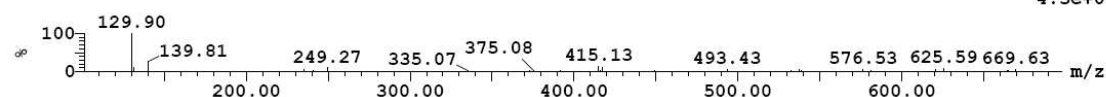

### Compound 4

Sample 88 Vial 1:88 ID 88 File ri845-88 Date 13-May-2006 Time 00:19:23 Description

3: UV Detector: TIC Smooth (Mn, 2x2)

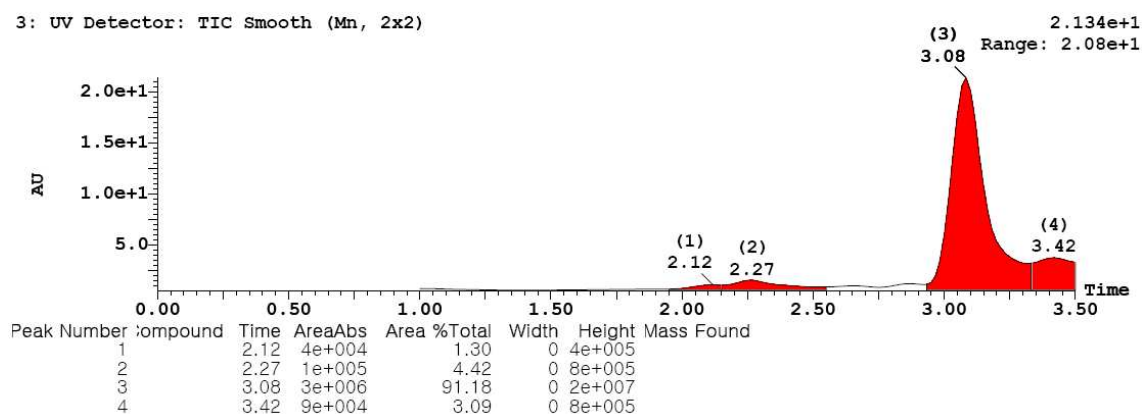

Peak ID :compound Time Mass Found  
3 3.08

Combine (129:134-102:104)

1:MS ES+  
5.0e+005

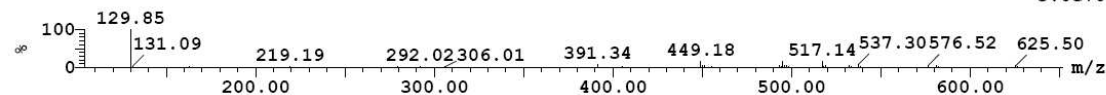

## Compound 5

Sample 2 Vial 3:2 ID B File ri847-2 Date 27-Nov-2008 Time 14:41:51 Description

3: UV Detector: TIC Smooth (Mn, 2x3)

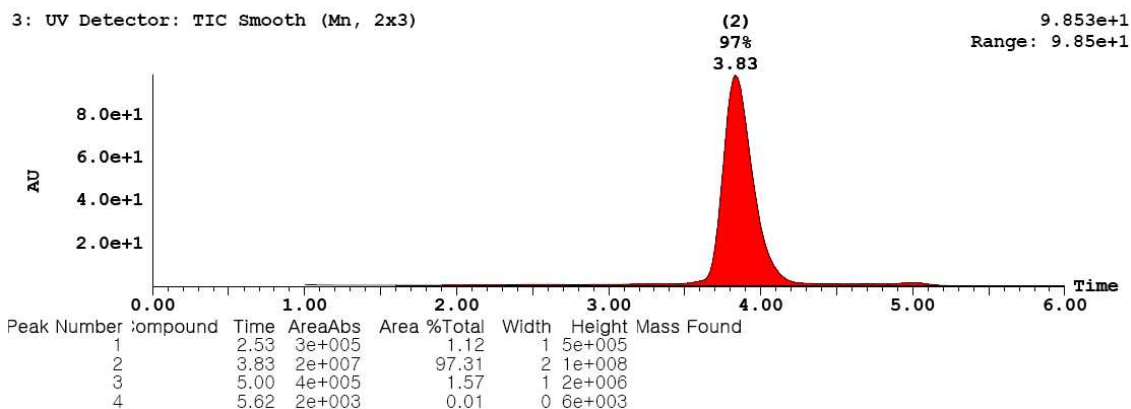

Peak ID :compound Time Mass Found  
2 3.83

Combine (188:193-(111:114+265:267))

1:MS ES+  
1.9e+007

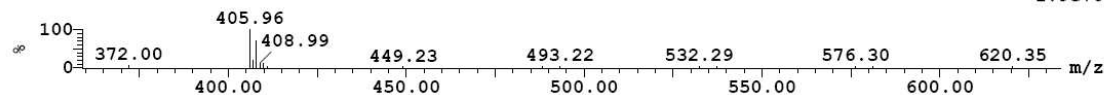

## Compound 6

Sample 3 Vial 3:3 ID C File ri847-3 Date 27-Nov-2008 Time 14:48:23 Description

3: UV Detector: TIC Smooth (Mn, 2x3)

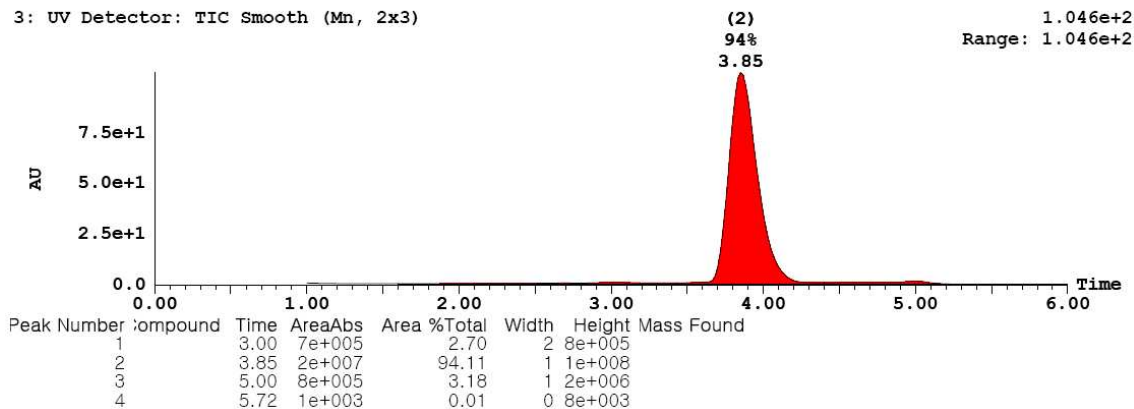

Peak ID :compound Time Mass Found  
2 3.85

Combine (189:194-(143:146+243:246))

1:MS ES+  
4.4e+006

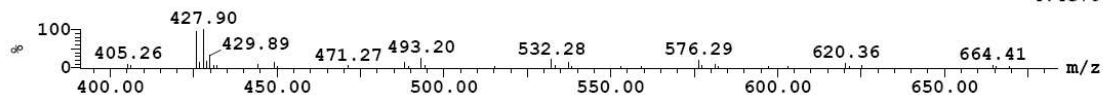



## Compound 7

Sample 31 Vial 1:31 ID 31 File ri845-31 Date 12-May-2006 Time 20:27:45 Description

3: UV Detector: TIC Smooth (Mn, 2x2)

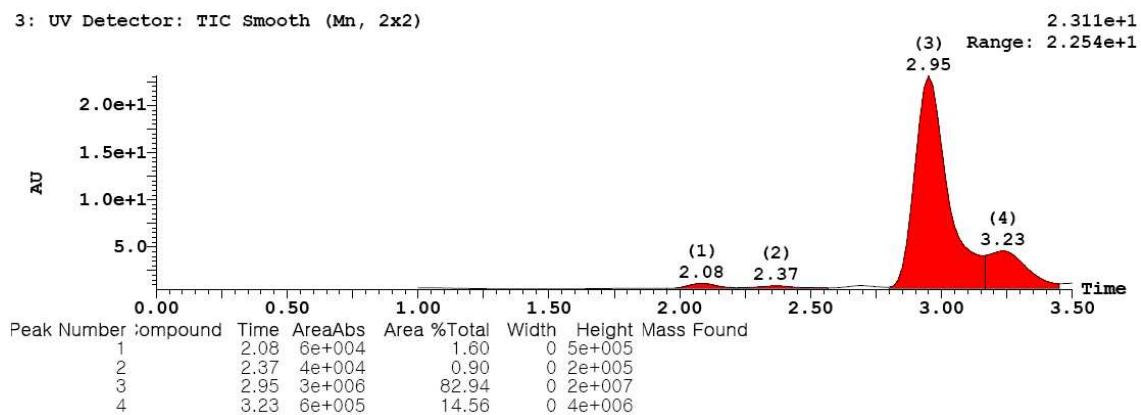

Peak ID :compound Time Mass Found  
3 2.95

Combine (124:128-96:98)

1:MS ES+  
5.8e+005

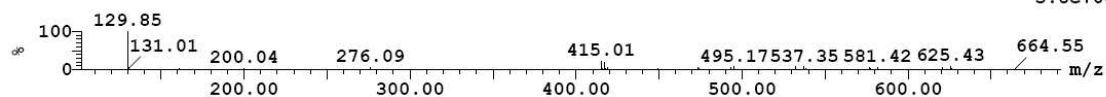

## Compound 8

Sample 76 Vial 3:76 ID 76 File ri806-76 Date 05-May-2006 Time 06:22:38 Description

3: UV Detector: TIC Smooth (Mn, 2x2)

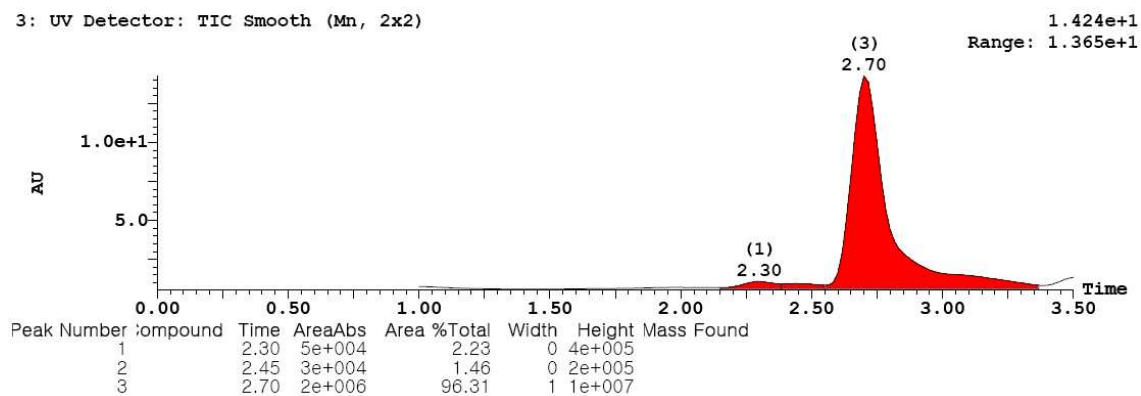

Peak ID :compound Time Mass Found  
3 2.70

Combine (113:117-86:88)

1:MS ES+  
1.5e+006

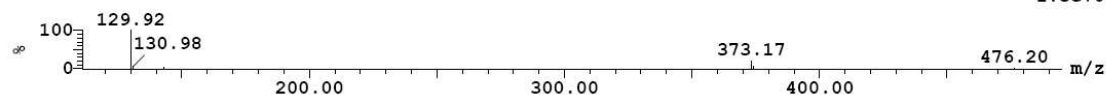

## Compound 9

Sample 4 Vial 3:4 ID D File r1847-4 Date 27-Nov-2008 Time 14:54:59 Description

3: UV Detector: TIC Smooth (Mn, 2x3)

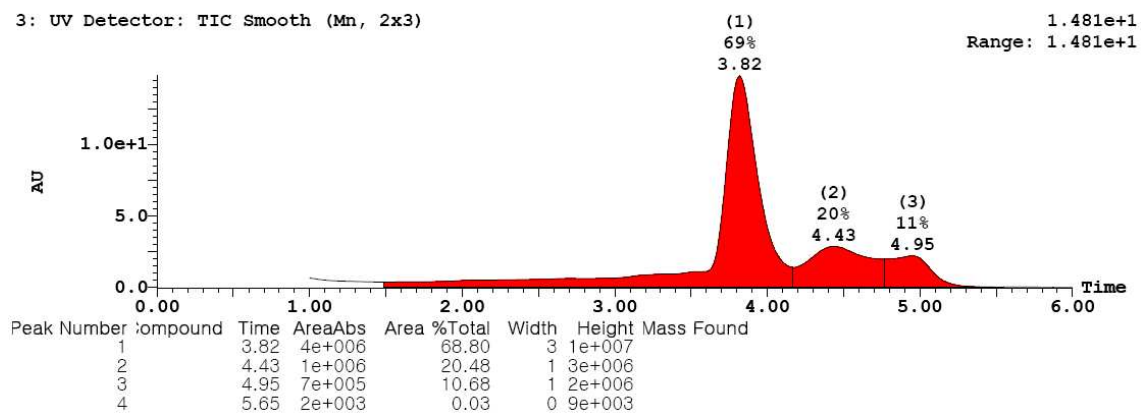

Peak ID :compound Time Mass Found  
1 3.82

Combine (187:192-(47:49+232:234))

1:MS ES+  
2.0e+006

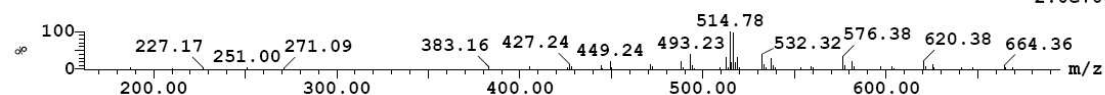

## Compound 10

Sample 10 Vial 1:10 ID 10 File r1863-10 Date 17-May-2006 Time 18:37:27 Description

3: UV Detector: TIC Smooth (Mn, 2x2)

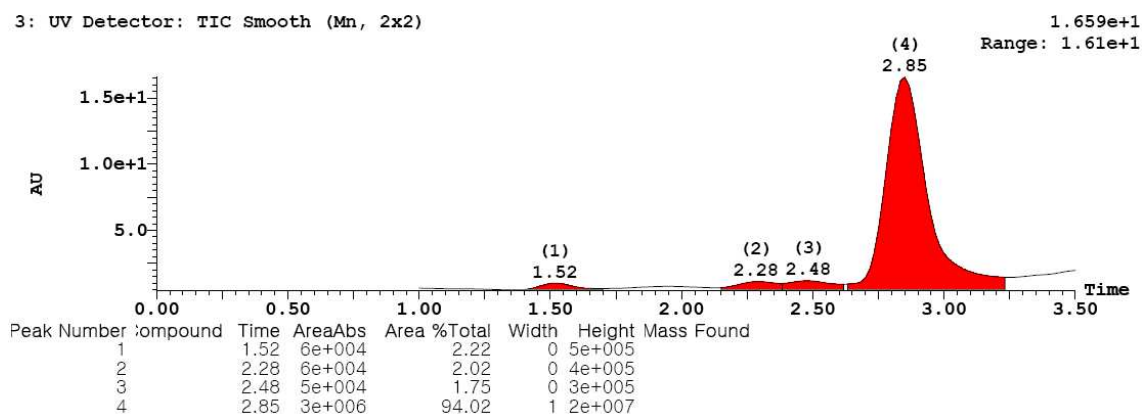

Peak ID :compound Time Mass Found  
4 2.85

Combine (120:124-89:91)

1:MS ES+  
3.8e+005

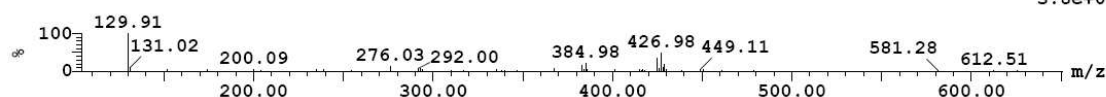

## Compound 11

Sample 5 Vial 3:5 ID E File ri847-5 Date 27-Nov-2008 Time 15:01:35 Description

3: UV Detector: TIC Smooth (Mn, 2x3)

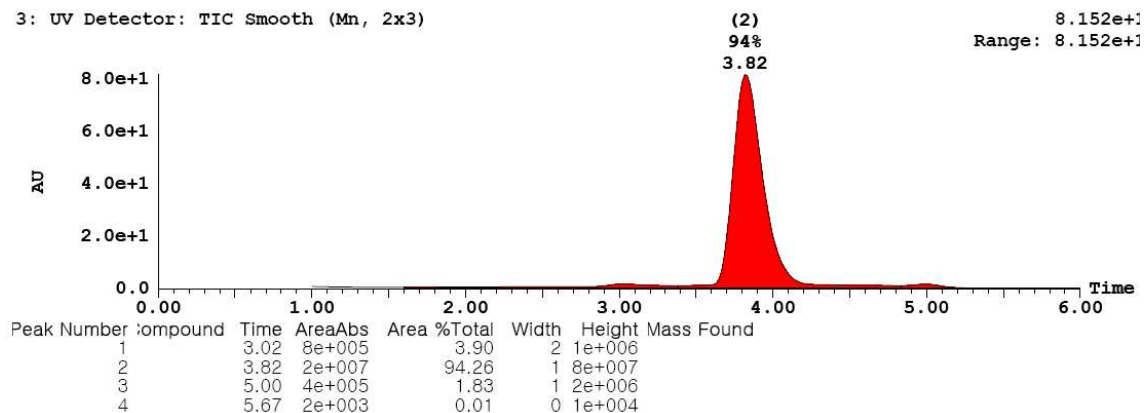

Peak ID :compound Time Mass Found  
2 3.82

Combine (187:192-(141:143+265:267))

1:MS ES+  
1.4e+007

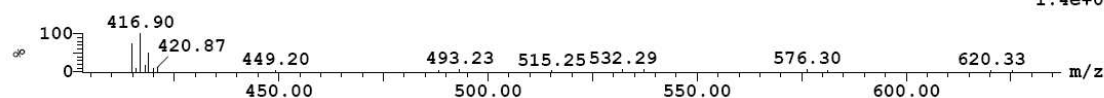

## Compound 12

Sample 92 Vial 3:92 ID 92 File ri806-92 Date 05-May-2006 Time 07:27:47 Description

3: UV Detector: TIC Smooth (Mn, 2x2)

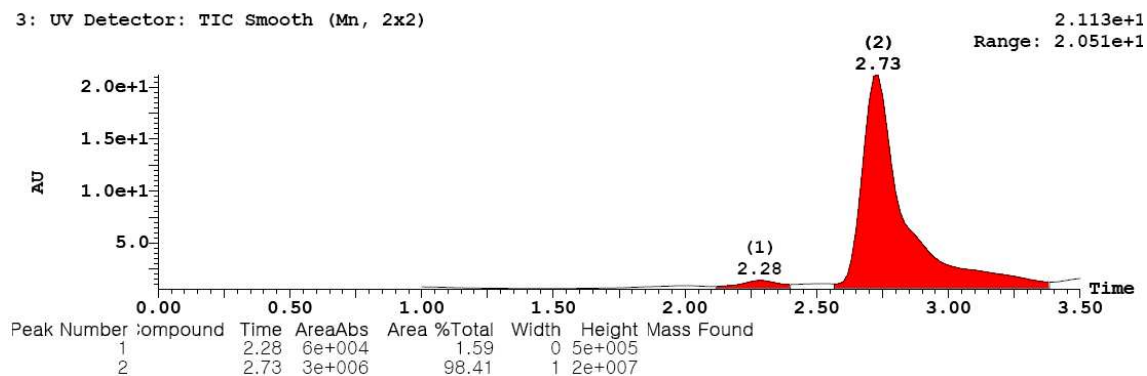

Peak ID :compound Time Mass Found  
2 2.73

Combine (115:119-86:88)

1:MS ES+  
8.5e+005

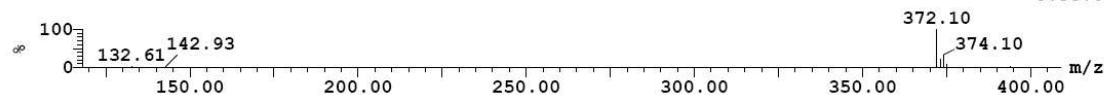

## Compound 13

Sample 24 Vial 2:24 ID 24 File ri839-24 Date 12-May-2006 Time 03:23:09 Description

3: UV Detector: TIC Smooth (Mn, 2x2)

2.363e+1  
Range: 2.309e+1

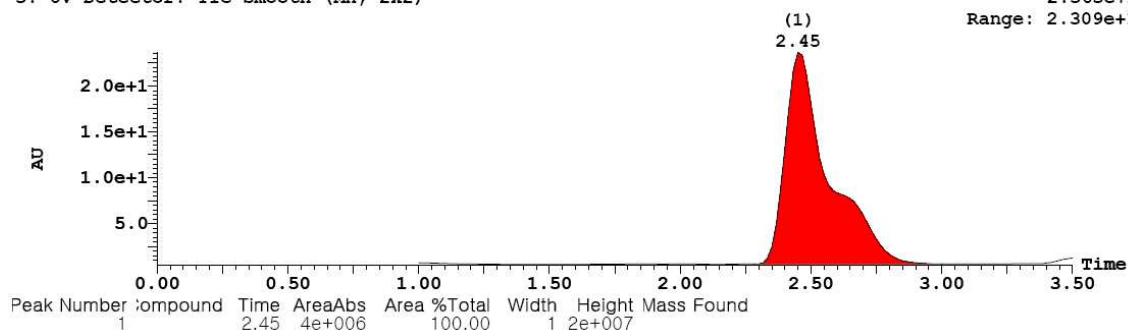

Peak ID :compound Time Mass Found  
1 2.45

Combine (103:107-74:76)

1:MS ES+  
1.7e+006

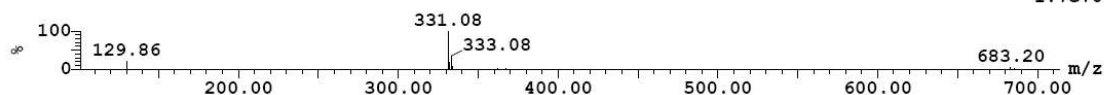

## Compound 14

Sample 11 Vial 2:11 ID 11 File ri839-11 Date 12-May-2006 Time 02:30:15 Description

3: UV Detector: TIC Smooth (Mn, 2x2)

1.999e+1  
Range: 1.945e+1

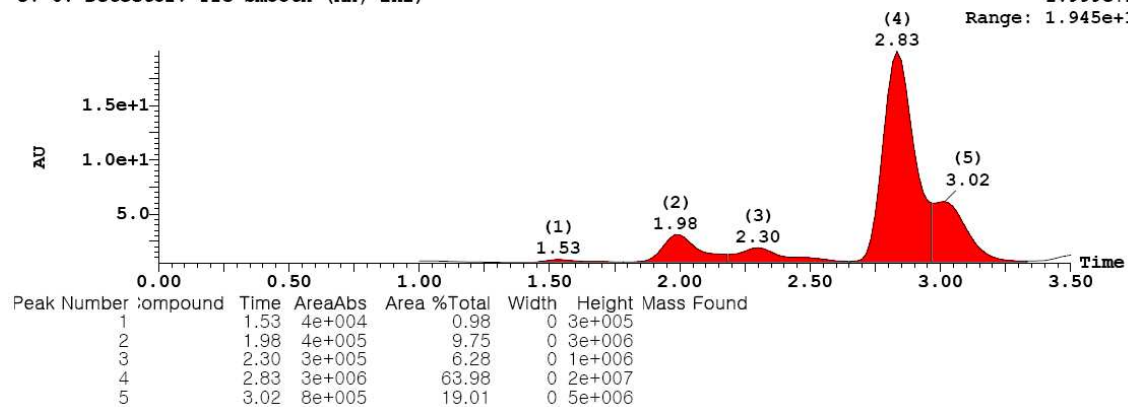

Peak ID :compound Time Mass Found  
4 2.83

Combine (119:123-(90:92+148:149))

1:MS ES+  
3.5e+005

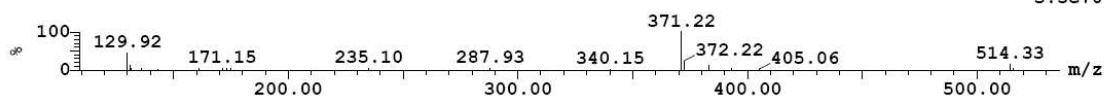

## Compound 15

Sample 84 Vial 2:84 ID 84 File ri899-84 Date 27-May-2006 Time 06:23:25 Description

3: UV Detector: TIC Smooth (Mn, 2x2)

1.53e+1  
Range: 1.497e+1

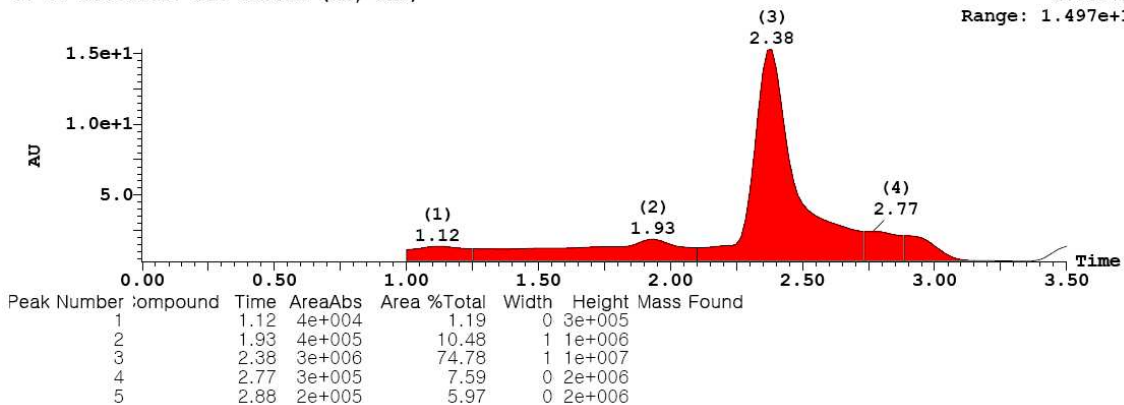

Peak ID :compound Time Mass Found  
3 2.38  
Combine (100:104-(66:69+138:140))

1:MS ES+  
7.0e+005

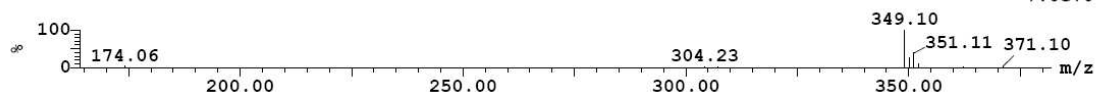

## Compound 16

Sample 42 Vial 1:42 ID 42 File ri845-42 Date 12-May-2006 Time 21:12:28 Description

3: UV Detector: TIC Smooth (Mn, 2x2)

2.408e+1  
Range: 2.353e+1

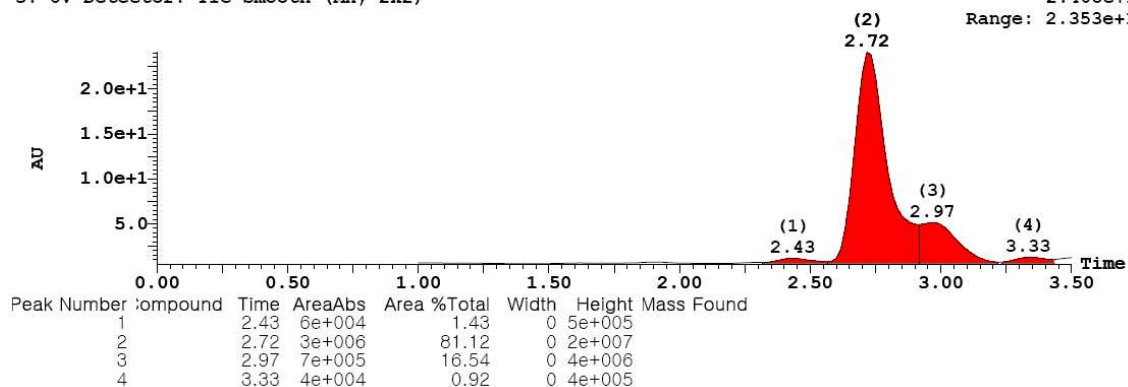

Peak ID :compound Time Mass Found  
2 2.72  
Combine (114:118-(86:88+146:148))

1:MS ES+  
2.6e+005

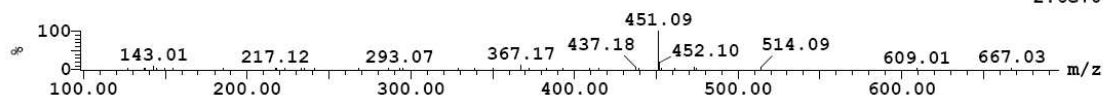

## Compound 17

Sample 6 Vial 3:6 ID F File ri847-6 Date 27-Nov-2008 Time 15:08:07 Description

3: UV Detector: TIC Smooth (Mn, 2x3)

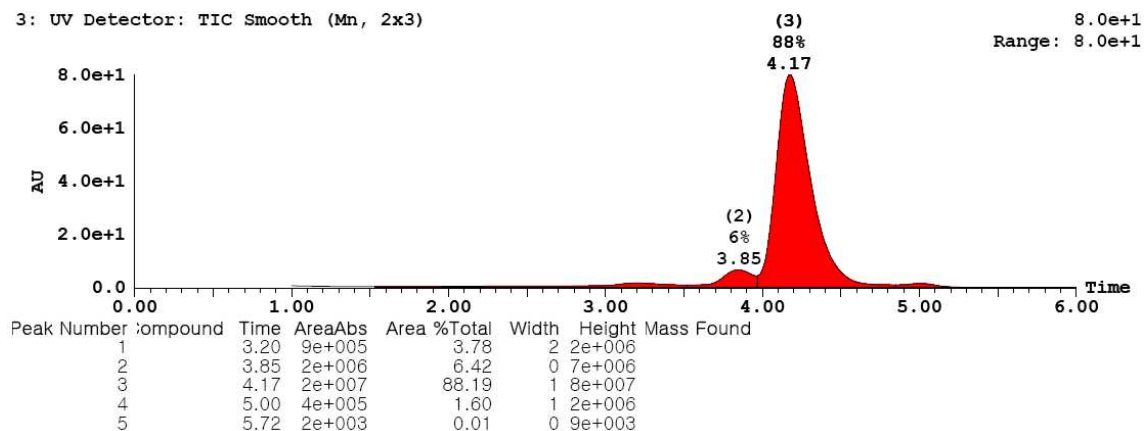

Peak ID :omponent Time Mass Found  
3 4.17

Combine (204:209-(170:172+266:268))

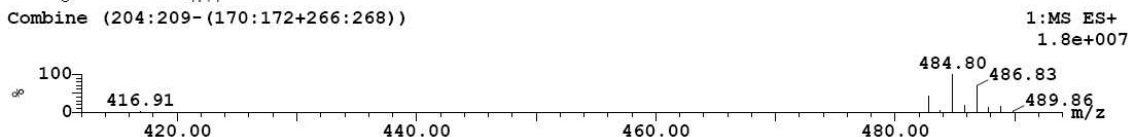

## Compound 18

Sample 59 Vial 1:59 ID 59 File ri863-59 Date 17-May-2006 Time 21:56:33 Description

3: UV Detector: TIC Smooth (Mn, 2x2)

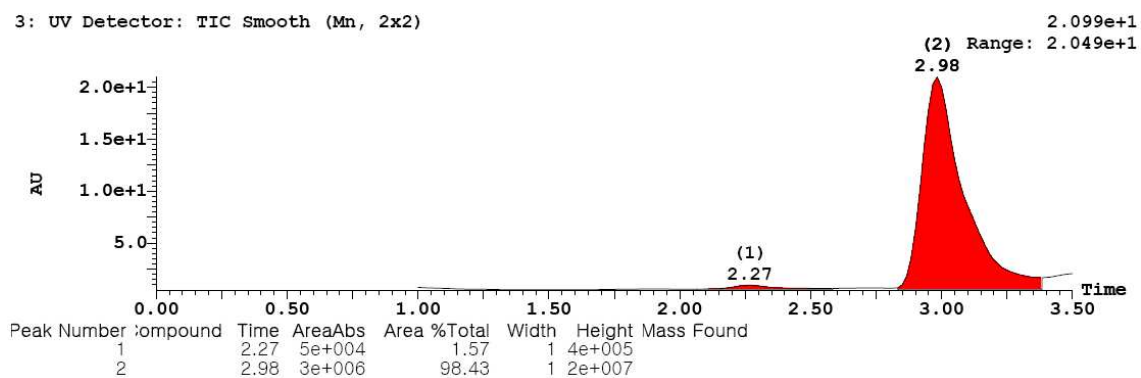

Peak ID :omponent Time Mass Found  
2 2.98

Combine (125:129-98:100)

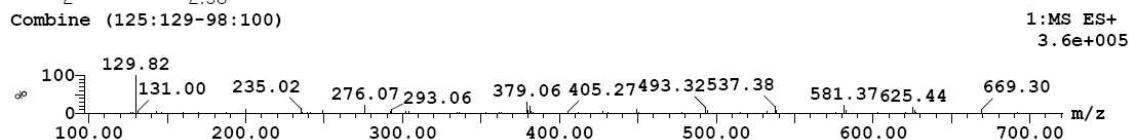



## Compound 19

Sample 5 Vial 1:5 ID 5 File ri845-05 Date 12-May-2006 Time 18:42:00 Description

3: UV Detector: TIC Smooth (Mn, 2x2)

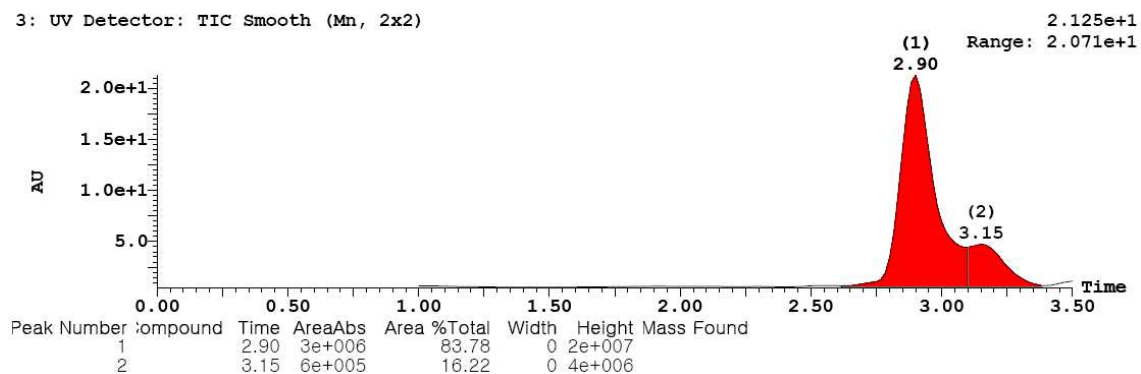

Peak ID :compound Time Mass Found  
1 2.90

Combine (122:126-88:91)

1:MS ES+  
5.5e+005

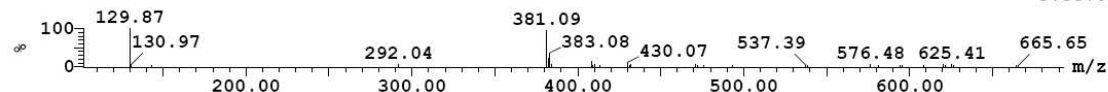

## Compound 20

Sample 7 Vial 3:7 ID 7 File ri915-07 Date 31-May-2006 Time 01:04:22 Description

3: UV Detector: TIC Smooth (Mn, 2x2)

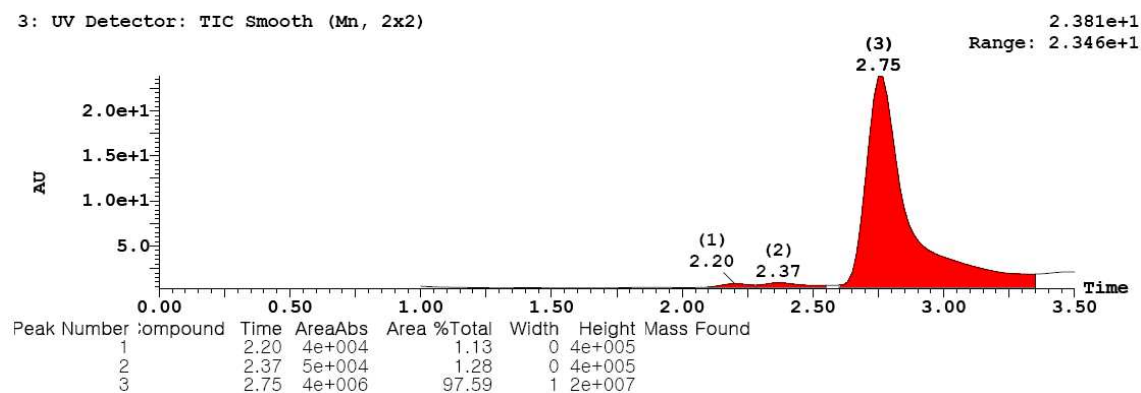

Peak ID :compound Time Mass Found  
3 2.75

Combine (115:120-88:90)

1:MS ES+  
4.4e+005

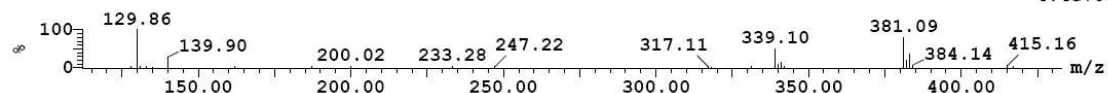

## Compound 21

Sample 4 Vial 1:4 ID 4 File ri863-04 Date 17-May-2006 Time 18:13:01 Description

3: UV Detector: TIC Smooth (Mn, 2x2)

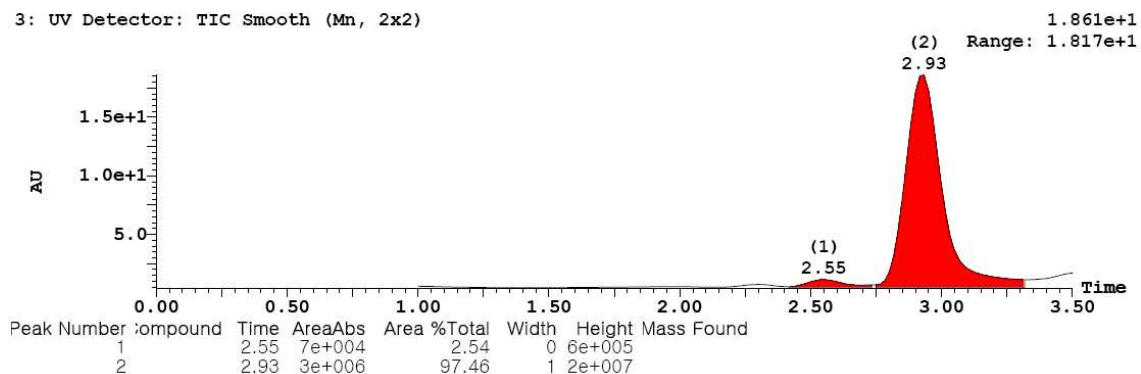

Peak ID :compound Time Mass Found  
2 2.93

Combine (123:127-94:96)

1:MS ES+  
4.5e+005

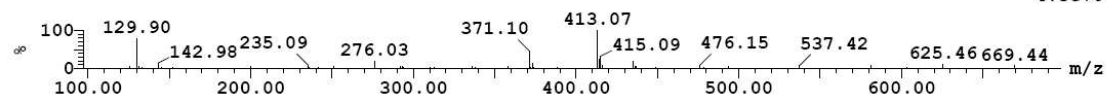

## Compound 22

Sample 65 Vial 1:65 ID 65 File ri845-65 Date 12-May-2006 Time 22:45:58 Description

3: UV Detector: TIC Smooth (Mn, 2x2)

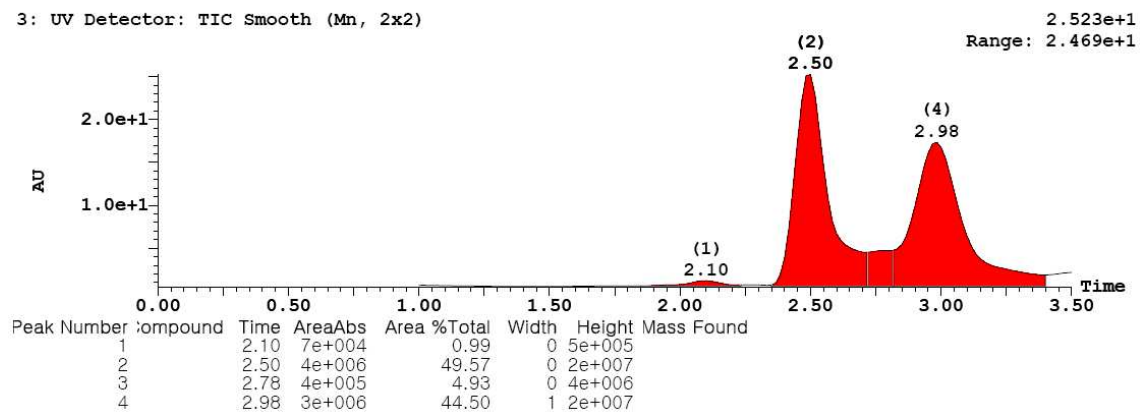

Peak ID :compound Time Mass Found  
2 2.50

Combine (105:109-(77:79+137:139))

1:MS ES+  
2.3e+006

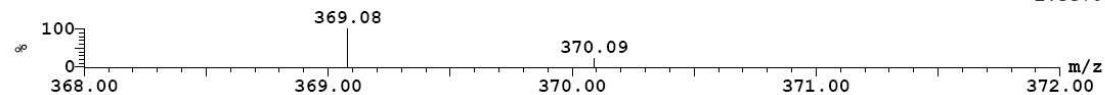

Supplement: Supplementary file 1 [file 4554880]
